# Supplementary material for: Identification of a new series of benzothiazinone derivatives with excellent antitubercular activity and improved pharmacokinetic profiles
Source: PubMed Central journal article supplement — RSC Adv. 2018 Mar 21;8(20):11163–76. doi: 10.1039/c8ra00720a (PMC9078972; doi:10.1039/c8ra00720a), 2018-03-21
Supplement: RA-008-C8RA00720A-s001.pdf [file RA-008-C8RA00720A-s001.pdf]

## Supplemental Material

### Identification of new series of benzothiazinone derivatives with excellent Antitubercular activity and improved pharmacokinetic profiles

Lu Xiong<sup>a,1</sup>, Chao Gao<sup>a,1,\*</sup>, Yao-Jie Shi<sup>a</sup>, Xin Tao<sup>a</sup>, Cui-Ting Peng<sup>a,b</sup>, Juan Rong<sup>a</sup>,  
Kun-Lin Liu<sup>a</sup>, Qian Lei<sup>a</sup>, Yi-Wen Zhang<sup>a</sup>, Ning-Yu Wang<sup>c</sup>, Luo-Ting Yu<sup>a,\*</sup>, Yu-Quan  
Wei<sup>a</sup>.

<sup>a</sup>State Key Laboratory of Biotherapy and Cancer Center, West China Hospital,  
Sichuan

University and Collaborative Innovation Center, Chengdu 610041, China

<sup>b</sup>Department of Pharmaceutical and Bioengineering, School of Chemical Engineering,  
Sichuan University, Chengdu, Sichuan 610065, China

<sup>c</sup>School of Life Science and Engineering, Southwest JiaoTong University, Sichuan  
611756, China

<sup>1</sup>These authors contributed equally to this work.

Table S1. The results of CYP450 inhibition test

| Comp    | CYP inhibitory (IC <sub>50</sub> , μM) |     |      |     |      |
|---------|----------------------------------------|-----|------|-----|------|
|         | 1A2                                    | 2C9 | 2C19 | 2D6 | 3A4  |
| 1a      | >10                                    | >10 | 5.52 | >10 | 5.33 |
| 2d      | >10                                    | >10 | >10  | >10 | >10  |
| 2h      | >10                                    | >10 | >10  | >10 | >10  |
| 3b      | >10                                    | >10 | 6.6  | >10 | >10  |
| 3c      | >10                                    | >10 | 8.6  | >10 | >10  |
| 3n      | >10                                    | >10 | >10  | >10 | >10  |
| 3o      | >10                                    | >10 | >10  | >10 | >10  |
| PBTZ169 | >10                                    | >10 | >10  | >10 | >10  |

Table S2. The results of plasma protein binding rate (PPB) test

| Comp     | species           | % Unbound (n = 3) | % Bound |
|----------|-------------------|-------------------|---------|
| 1a       | Human Plasma      | 9.3               | 90.7    |
|          | CD-1 Mouse Plasma | 3.0               | 97      |
| 2d       | Human Plasma      | 7.5               | 92.5    |
|          | CD-1 Mouse Plasma | NA                | >99     |
| 2h       | Human Plasma      | 0.2               | 99.8    |
|          | CD-1 Mouse Plasma | NA                | >99     |
| 3b       | Human Plasma      | NA                | >99     |
|          | CD-1 Mouse Plasma | 5.3               | 94.7    |
| 3c       | Human Plasma      | NA                | >99     |
|          | CD-1 Mouse Plasma | 2.6               | 97.4    |
| 3n       | Human Plasma      | 0.6               | 99.4    |
|          | CD-1 Mouse Plasma | 0.5               | 99.5    |
| 3o       | Human Plasma      | 1.9               | 98.1    |
|          | CD-1 Mouse Plasma | 1.4               | 98.6    |
| PBTZ169  | Human Plasma      | 0.4               | 99.6    |
|          | CD-1 Mouse Plasma | 0.2               | 99.8    |
| Warfarin | Human Plasma      | 1.1               | 98.9    |
|          | CD-1 Mouse Plasma | 2.8               | 97.2    |

Table S3. Plasma concentration-Time data of IV 3o at 10 mg/kg in ICR Mice

| Time (hr) | Compound 3o- IV – 10 mg/kg   |         |         |         |        |
|-----------|------------------------------|---------|---------|---------|--------|
|           | Plasma Concentration (ng/mL) |         |         |         |        |
|           | #1                           | #2      | #3      | mean    | SD     |
| 0         | 0.00                         | 0.00    | 0.00    | 0       | 0      |
| 0.083     | 5927.55                      | 5625.01 | 5469.73 | 5674.10 | 232.82 |
| 0.25      | 1595.32                      | 1851.29 | 1494.62 | 1647.08 | 183.88 |
| 0.5       | 889.71                       | 1073.88 | 788.25  | 917.28  | 144.80 |
| 1         | 458.59                       | 551.66  | 453.35  | 487.86  | 55.31  |
| 2         | 275.65                       | 211.20  | 296.38  | 261.08  | 44.42  |
| 4         | 100.79                       | 61.64   | 72.21   | 78.22   | 20.25  |
| 8         | 21.77                        | 20.80   | 19.65   | 20.74   | 1.06   |
| 24        | BLQ <sup>a</sup>             | 1.08    | BLQ     | 0.36    | 0.62   |

<sup>a</sup>BQL: Below quantifiable limit of 1 ng/mL.

Table S4. Plasma concentration-time data of PO 3o at 100 mg/kg in ICR Mice

| Time (hr) | Compound 3o- PO – 100 mg/kg  |         |         |         |         |
|-----------|------------------------------|---------|---------|---------|---------|
|           | Plasma Concentration (ng/mL) |         |         |         |         |
|           | #1                           | #2      | #3      | mean    | SD      |
| 0         | 0.00                         | 0.00    | #3      | 0       | 0       |
| 0.083     | 46.54                        | 125.12  | 0.00    | 219.79  | 235.33  |
| 0.25      | 1646.81                      | 1312.10 | 487.71  | 1523.99 | 184.27  |
| 0.5       | 2667.07                      | 3194.37 | 1613.05 | 2036.66 | 1570.84 |
| 1         | 2674.75                      | 3803.50 | 248.54  | 2588.77 | 1259.92 |
| 2         | 3250.43                      | 1982.91 | 1288.07 | 2648.48 | 636.15  |
| 4         | 1089.51                      | 1067.12 | 2712.09 | 1081.62 | 12.57   |
| 8         | 386.99                       | 428.46  | 1088.23 | 330.49  | 135.38  |
| 24        | 5.33                         | 0.00    | 176.01  | 3.34    | 2.91    |

Table S5. Lung concentration-time data of IV 3o at 10 mg/kg in ICR Mice

| Time (hr) | Compound 3o- IV – 10 mg/kg |         |          |                 |         |
|-----------|----------------------------|---------|----------|-----------------|---------|
|           | Lung Concentration (ng/mL) |         |          |                 |         |
|           | #1                         | #2      | #3       | mean            | SD      |
| 0         | 0.00                       | 0.00    | 0.00     | 0               | 0       |
| 0.083     | 10475.90                   | 5938.49 | 10203.30 | 8872.56         | 2544.64 |
| 0.25      | 5271.23                    | 2398.81 | 5706.41  | 4458.82         | 1797.24 |
| 0.5       | 1925.60                    | 1142.93 | 1221.81  | 1430.11         | 430.91  |
| 1         | 2293.06                    | 1911.66 | 494.53   | 1566.42         | 947.67  |
| 2         | 330.09                     | 425.51  | 313.80   | 356.46          | 60.34   |
| 4         | 179.03                     | 148.69  | 61.44    | 129.72          | 61.05   |
| 8         | 48.33                      | 30.87   | 15.65    | 31.62           | 16.35   |
| 24        | BLQ                        | BLQ     | BLQ      | NA <sup>a</sup> | NA      |

<sup>a</sup>NA: not applicable

Table S6. Lung concentration-time data of PO 3o at 100mg/kg in ICR Mice

| Time (hr) | Compound 3o- PO – 100 mg/kg |         |         |         |         |
|-----------|-----------------------------|---------|---------|---------|---------|
|           | Lung Concentration (ng/mL)  |         |         |         |         |
|           | #1                          | #2      | #3      | mean    | SD      |
| 0         | 0.00                        | 0.00    | 0.00    | 0       | 0       |
| 0.083     | 2907.51                     | 75.37   | 353.88  | 1112.26 | 1560.96 |
| 0.25      | 2497.99                     | 1074.86 | 2006.19 | 1859.68 | 722.79  |
| 0.5       | 5113.07                     | 4134.11 | 4324.59 | 4523.92 | 519.03  |
| 1         | 1735.60                     | 1610.14 | 1076.20 | 1473.98 | 350.15  |
| 2         | 8817.91                     | 2939.96 | 1977.11 | 4578.33 | 3703.02 |
| 4         | 2518.35                     | 1500.92 | 3424.34 | 2481.20 | 962.25  |
| 8         | 577.01                      | 971.32  | 358.05  | 635.46  | 310.78  |
| 24        | 9.65                        | BLQ     | 23.40   | 16.53   | 9.72    |

Table S7. Plasma concentration-time data of IV PBTZ169 at 10mg/kg in ICR Mice

| Time (hr) | Compound PBTZ169- IV – 10 mg/kg |          |          |          |        |
|-----------|---------------------------------|----------|----------|----------|--------|
|           | Lung Concentration (ng/mL)      |          |          |          |        |
|           | #1                              | #2       | #3       | mean     | SD     |
| 0         | 0.00                            | 0.00     | 0.00     | 0        | 0      |
| 0.083     | 14897.10                        | 15382.60 | 16521.50 | 15600.40 | 833.81 |
| 0.25      | 6982.21                         | 7304.63  | 7094.05  | 7126.96  | 163.71 |
| 0.5       | 4953.36                         | 3806.25  | 4714.46  | 4491.36  | 605.22 |
| 1         | 3033.80                         | 1589.81  | 1646.61  | 2090.07  | 817.78 |
| 2         | 306.89                          | 431.92   | 385.97   | 374.93   | 63.24  |
| 4         | 118.27                          | 159.22   | 138.48   | 138.66   | 20.47  |
| 8         | 36.67                           | 35.39    | 61.22    | 44.43    | 14.56  |
| 24        | 0.98                            | BLQ      | 1.24     | 0.74     | 0.65   |

Table S8. Plasma concentration-time data of PO PBTZ169 at 100mg/kg in ICR Mice

| Time (hr) | Compound PBTZ169- PO – 100 mg/kg |         |         |         |         |
|-----------|----------------------------------|---------|---------|---------|---------|
|           | Lung Concentration (ng/mL)       |         |         |         |         |
|           | #1                               | #2      | #3      | mean    | SD      |
| 0         | 0.00                             | 0.00    | 0.00    | 0       | 0       |
| 0.083     | 271.35                           | 59.99   | 403.87  | 245.07  | 173.44  |
| 0.25      | 2526.72                          | NA      | 2031.01 | 2278.87 | 350.52  |
| 0.5       | 3367.91                          | 2456.89 | 2887.06 | 2903.95 | 455.74  |
| 1         | 1578.37                          | 2542.78 | 2520.16 | 2213.77 | 550.39  |
| 2         | 3413.83                          | 3100.69 | 2474.50 | 2996.34 | 478.28  |
| 4         | 3230.39                          | 1290.61 | 3227.09 | 2582.70 | 1118.98 |
| 8         | 530.95                           | 298.97  | 176.66  | 335.53  | 179.95  |
| 24        | 4.39                             | 1.97    | 1.58    | 2.65    | 1.52    |

Table S9. Lung concentration-time data of IV PBTZ169 at 10mg/kg in ICR Mice

| Time (hr) | Compound PBTZ169- IV – 10 mg/kg |         |          |         |         |
|-----------|---------------------------------|---------|----------|---------|---------|
|           | Lung Concentration (ng/mL)      |         |          |         |         |
|           | #1                              | #2      | #3       | mean    | SD      |
| 0         | 0.00                            | 0.00    | 0.00     | 0       | 0       |
| 0.083     | 2978.22                         | 5704.70 | 3943.30  | 4208.74 | 1382.49 |
| 0.25      | 2360.87                         | 3958.11 | 2156.86  | 2825.28 | 986.35  |
| 0.5       | 2839.43                         | 2233.08 | 3032.11  | 2701.54 | 416.98  |
| 1         | 1862.42                         | 1943.09 | 2756.36  | 2187.29 | 494.48  |
| 2         | 1529.74                         | 1451.11 | 1260.69  | 1413.85 | 138.34  |
| 4         | 1069.48                         | 1272.45 | 6192.32* | 1170.97 | 143.52  |
| 8         | 1293.98                         | 127.82  | 181.02   | 534.27  | 658.46  |
| 24        | 24.17                           | 9.23    | 11.64    | 15.01   | 8.02    |

\* found to be an outlier.

Table S10. Lung concentration-time data of PO PBTZ169 at 100mg/kg in ICR Mice

| Time (hr) | Compound PBTZ169- PO – 100 mg/kg |        |        |        |        |
|-----------|----------------------------------|--------|--------|--------|--------|
|           | Lung Concentration (ng/mL)       |        |        |        |        |
|           | #1                               | #2     | #3     | mean   | SD     |
| 0         | 0.00                             | 0.00   | 0.00   | 0      | 0      |
| 0.083     | 56.10                            | 244.23 | 87.32  | 129.22 | 100.82 |
| 0.25      | 671.12                           | 363.14 | 259.89 | 431.38 | 213.94 |
| 0.5       | 794.37                           | 723.93 | 915.75 | 811.35 | 97.03  |
| 1         | 242.66                           | 247.29 | 658.28 | 382.74 | 238.63 |
| 2         | 679.38                           | 479.10 | 772.61 | 643.69 | 149.97 |
| 4         | 522.22                           | 656.24 | 682.83 | 620.43 | 86.09  |
| 8         | 584.03                           | 218.32 | 386.68 | 396.34 | 183.04 |
| 24        | 38.58                            | 11.15  | 25.61  | 25.11  | 13.72  |
